# Supplementary material for: Multidrug-Resistant Pseudomonas aeruginosa Accelerate Intestinal, Extra-Intestinal, and Systemic Inflammatory Responses in Human Microbiota-Associated Mice With Subacute Ileitis
Source: PubMed Central journal article supplement (PMC6361842; doi:10.3389/fimmu.2019.00049), 2019-01-29

# A

## Apoptotic Cells (Casp3+) - ILEUM

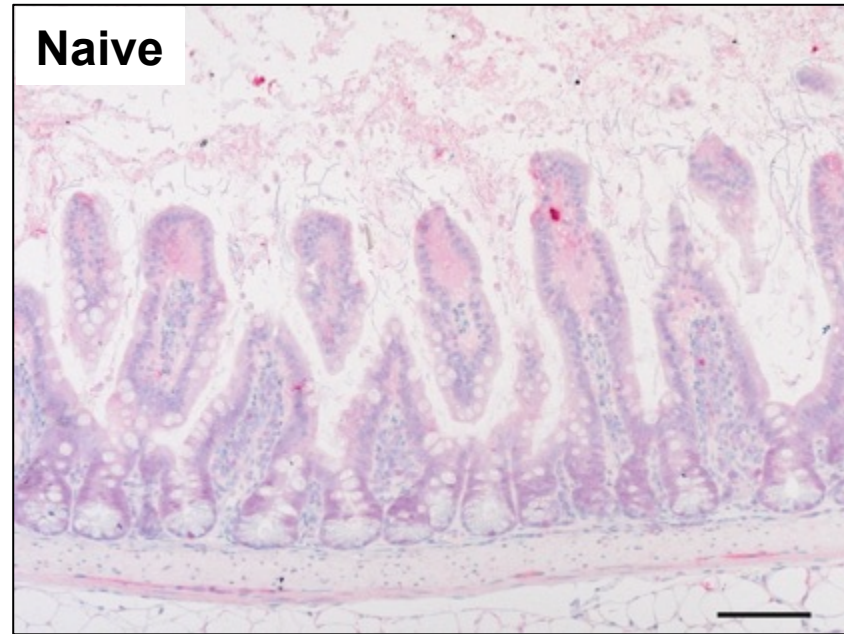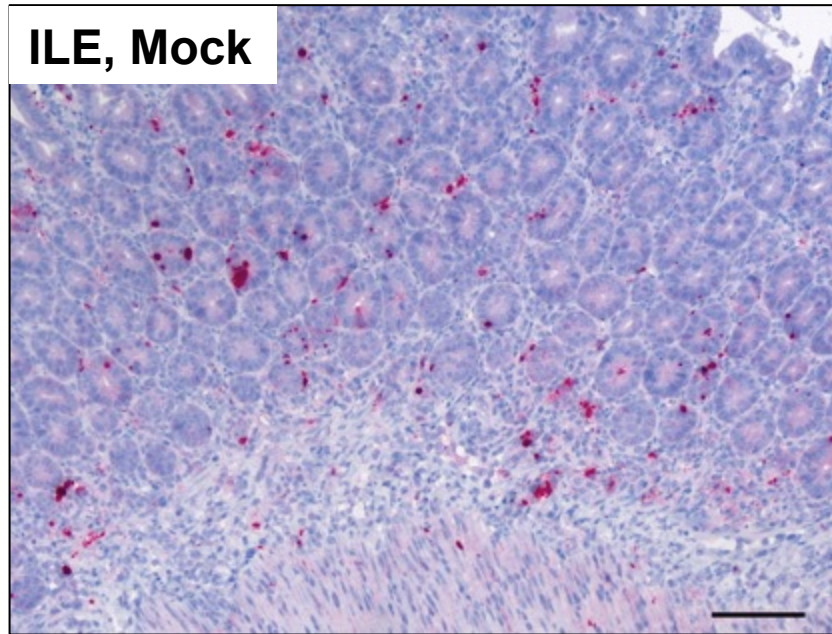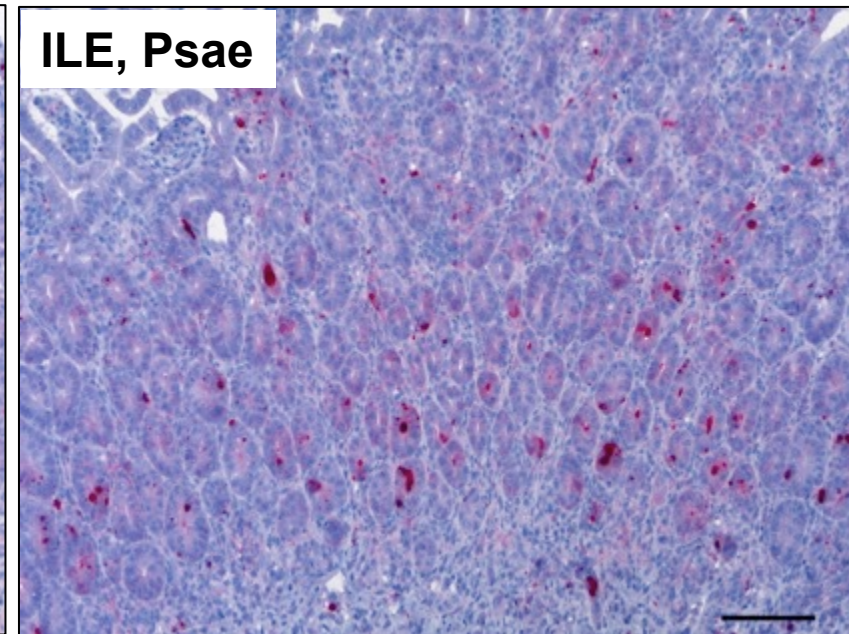

**B**

# Proliferating Cells (Ki67+) - ILEUM

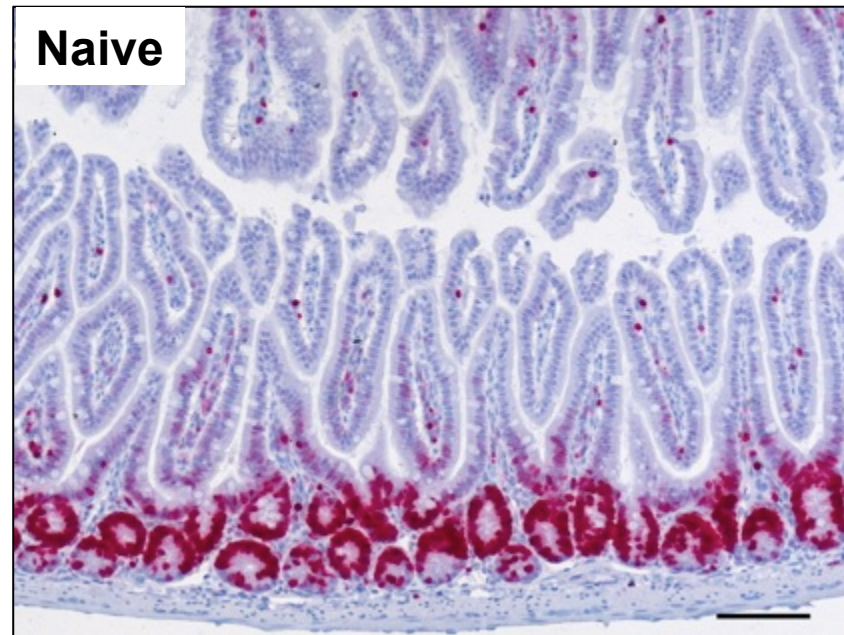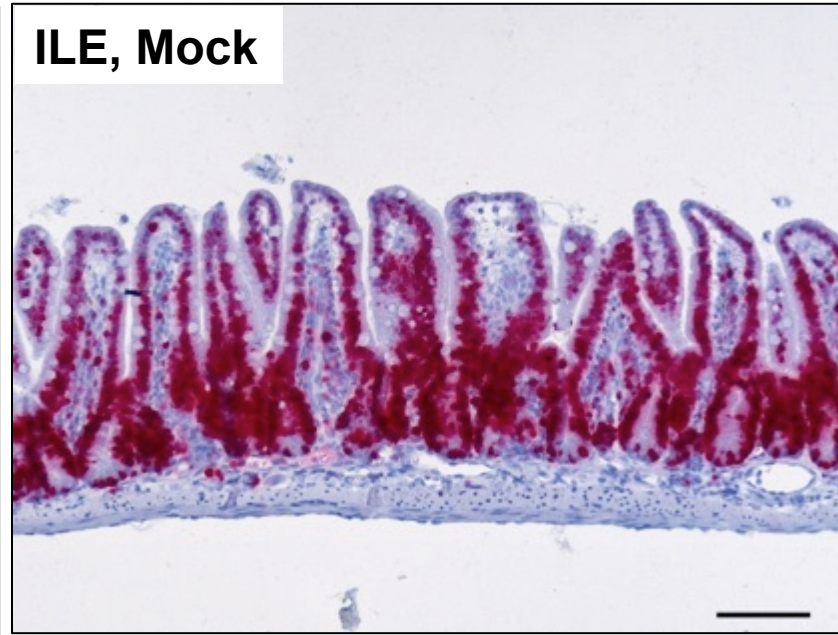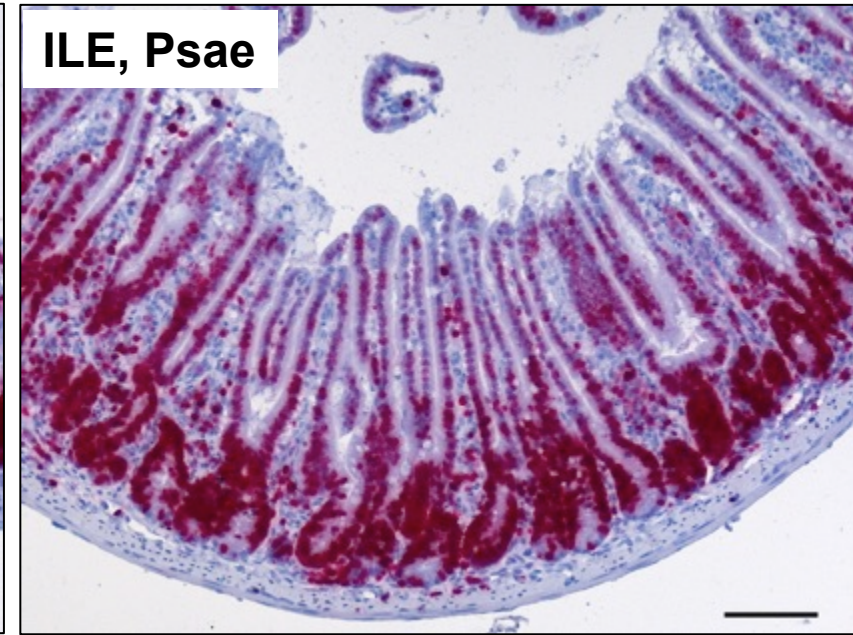

**C**

# T Lymphocytes (CD3+) - ILEUM

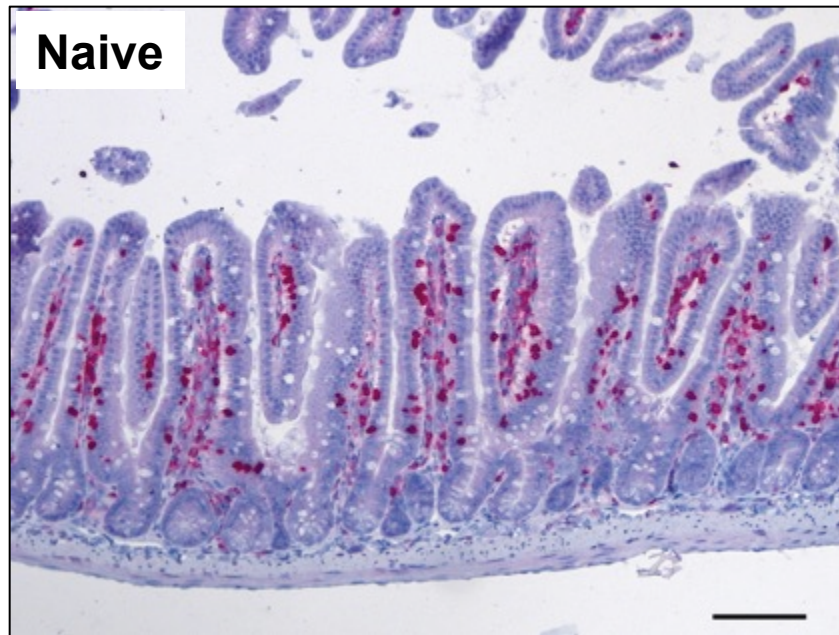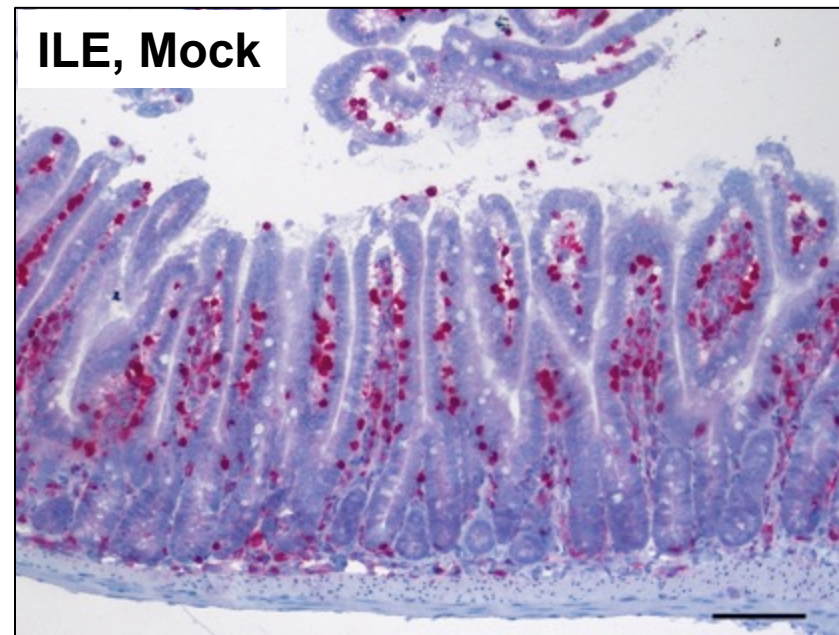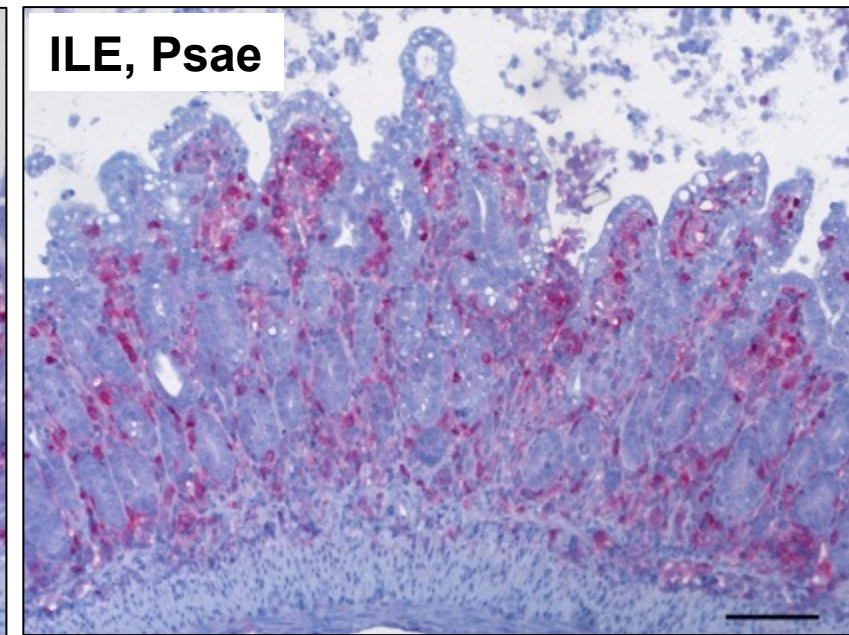

**D**

# Regulatory T Cells (Treg; FOXP3+) - ILEUM

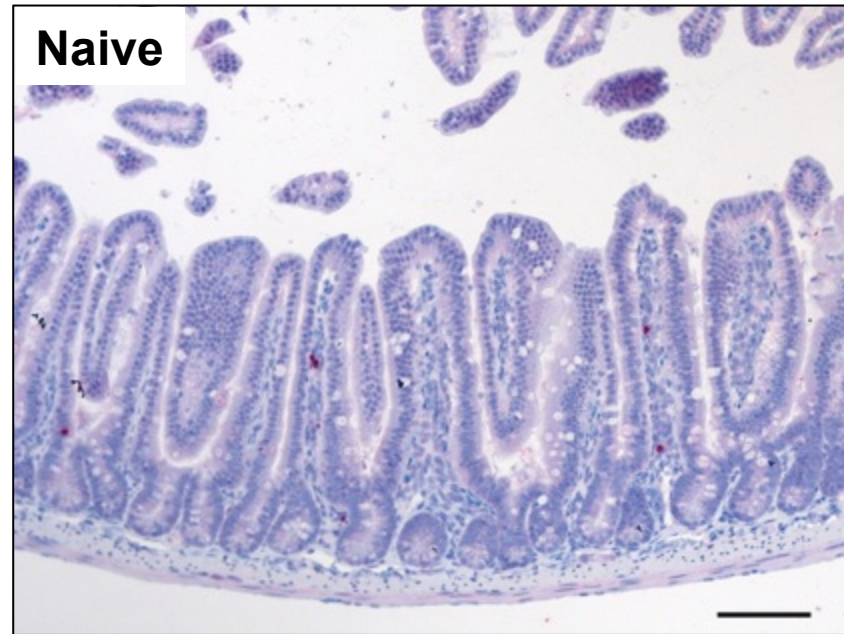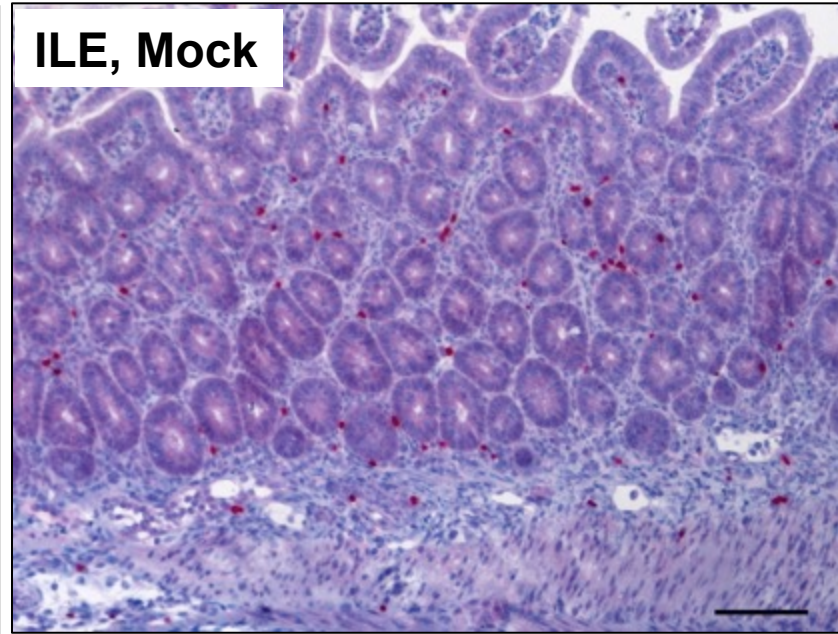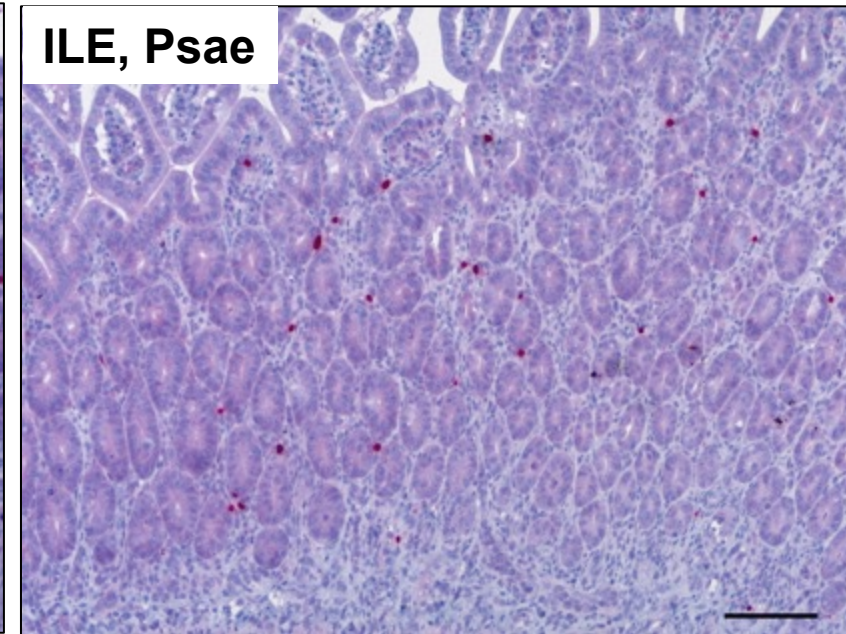

**E**

# Apoptotic Cells (Casp3+) - COLON

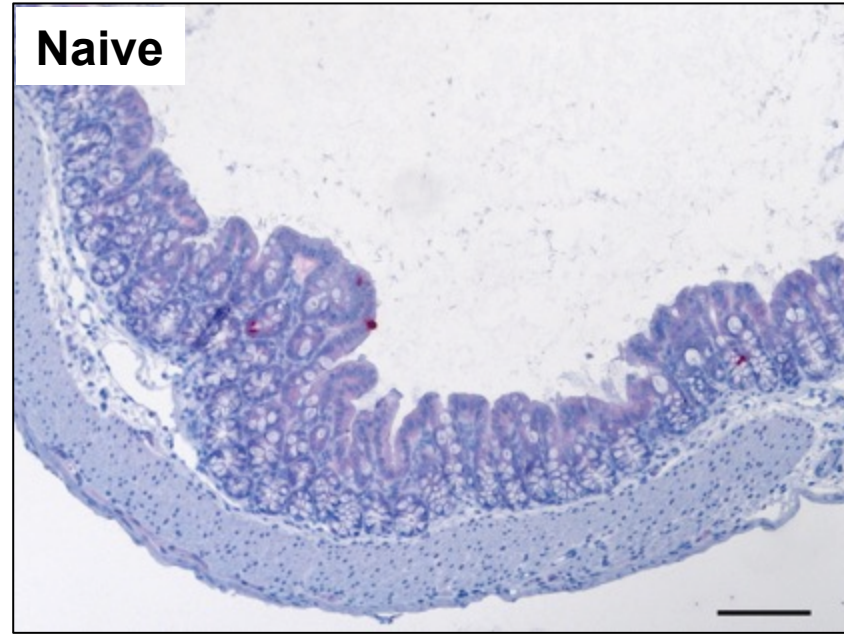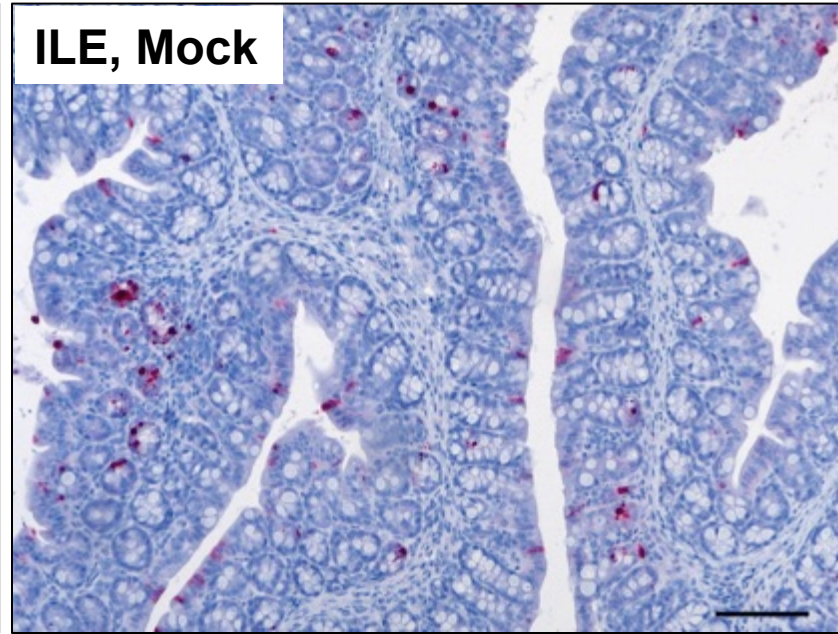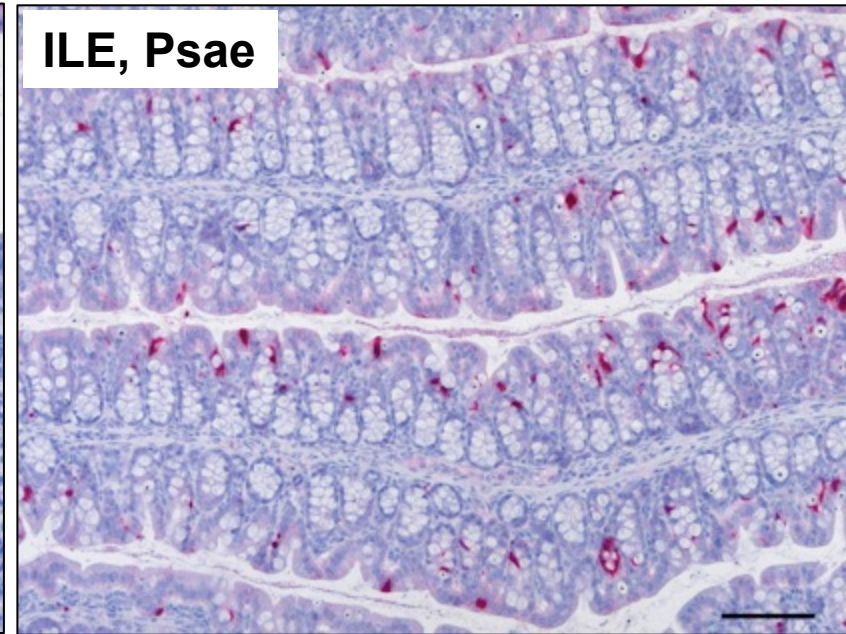

**F**

# Proliferating Cells (Ki67+) - COLON

**Naive**

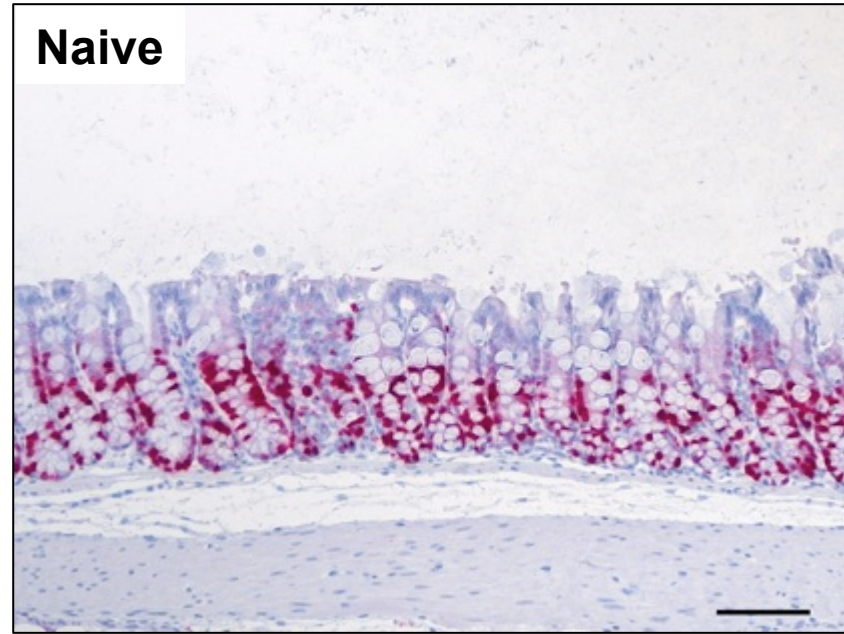

**ILE, Mock**

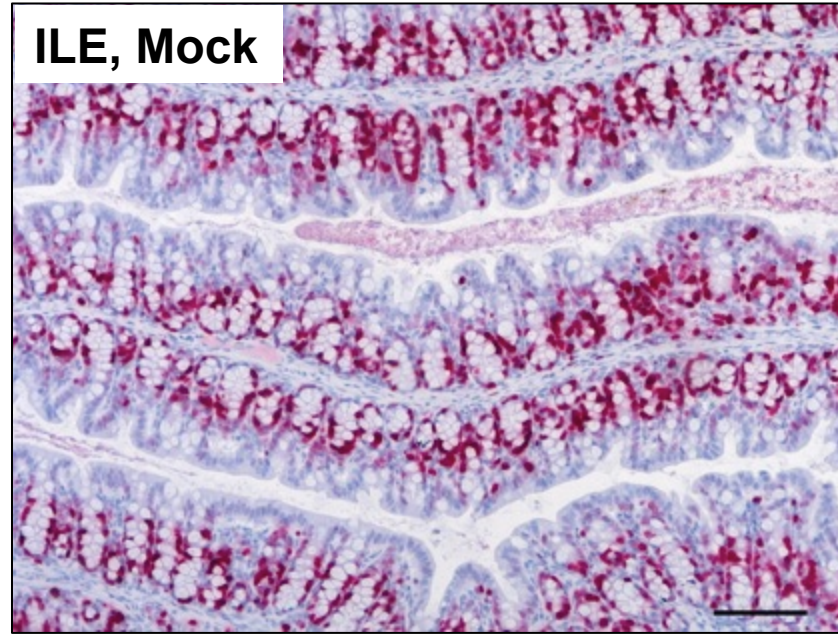

**ILE, Psae**

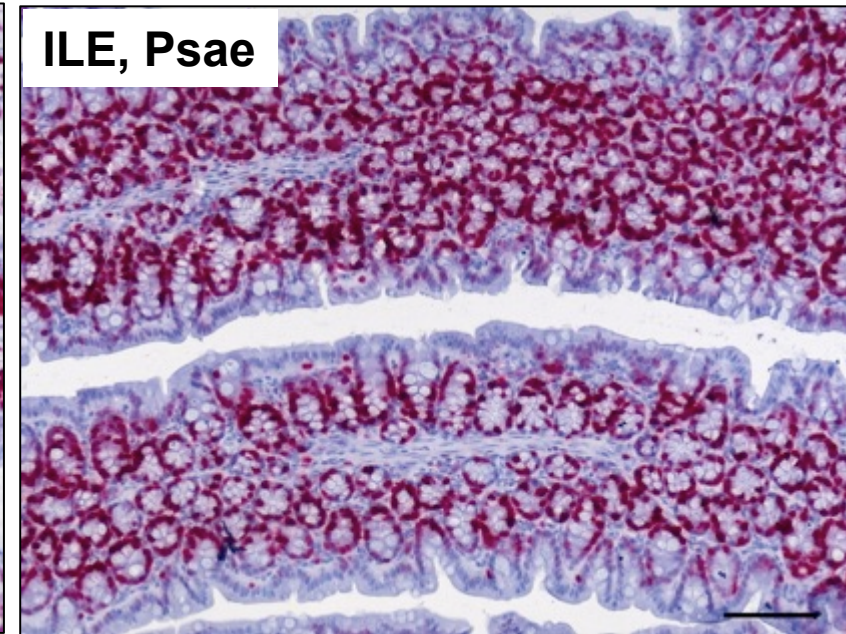

**G**

# T Lymphocytes (CD3+) - COLON

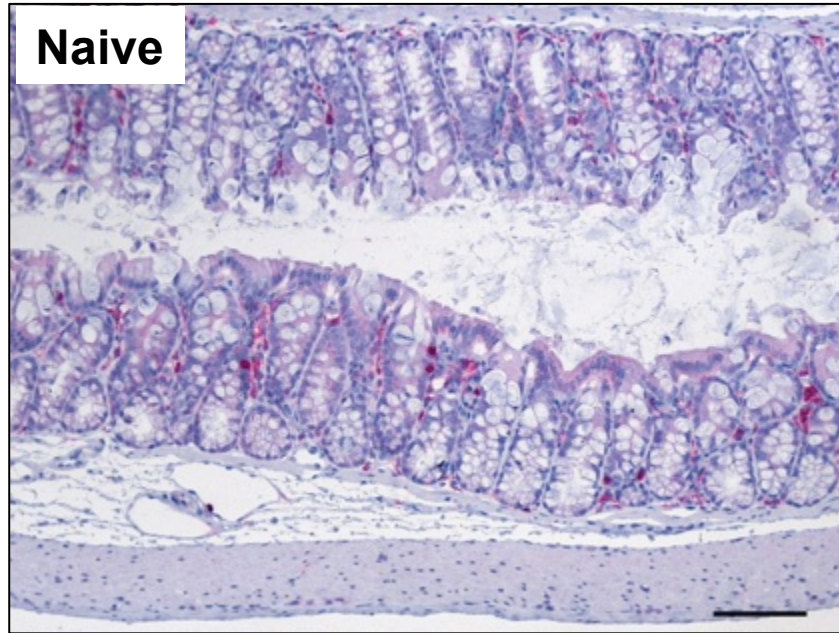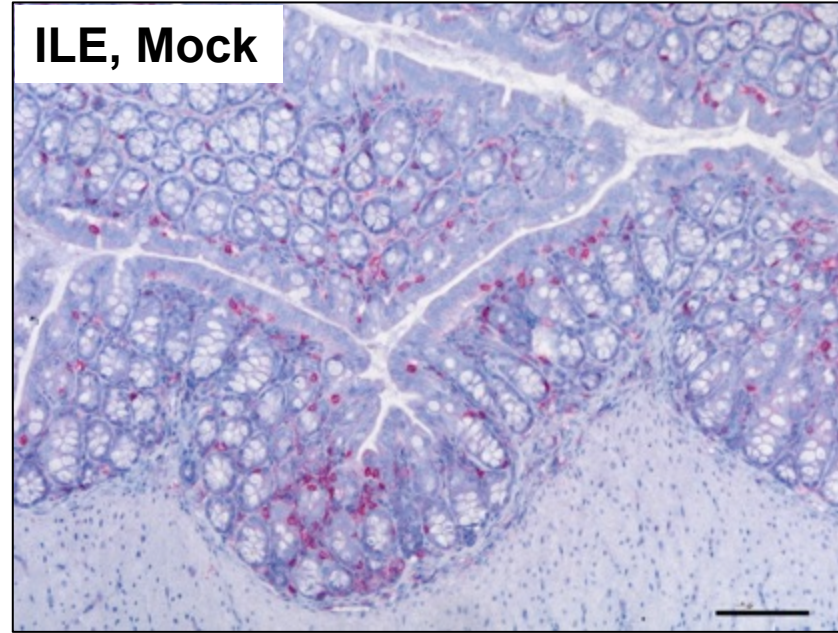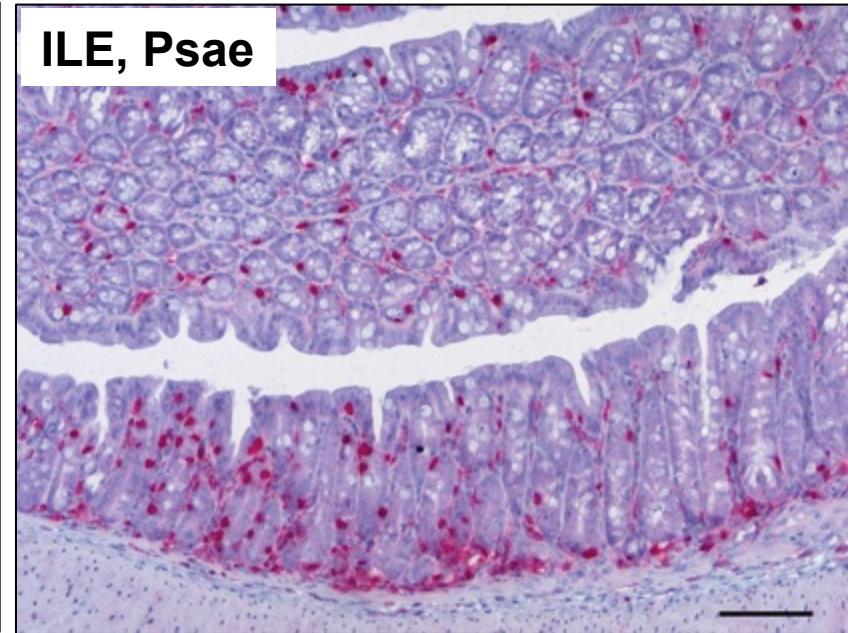

# H

## Regulatory T Cells (Treg; FOXP3+) - COLON

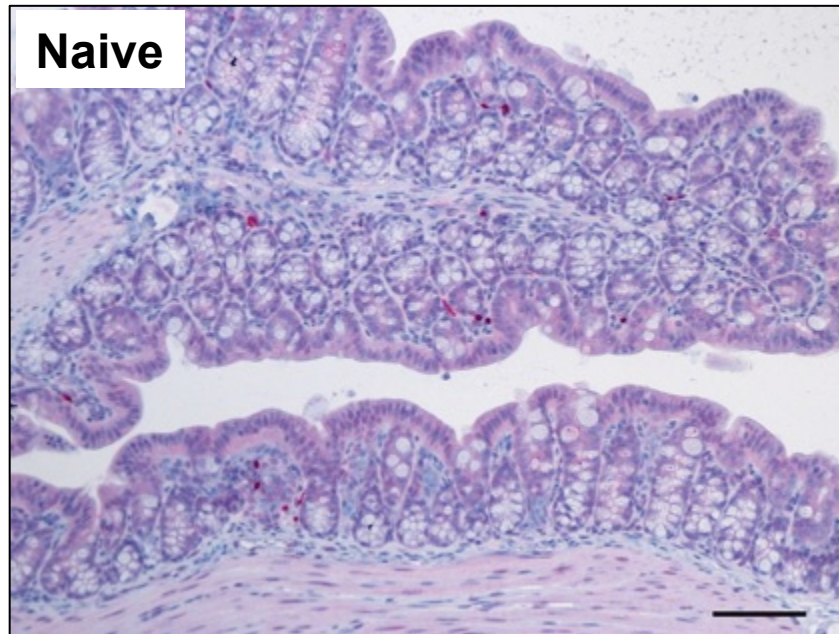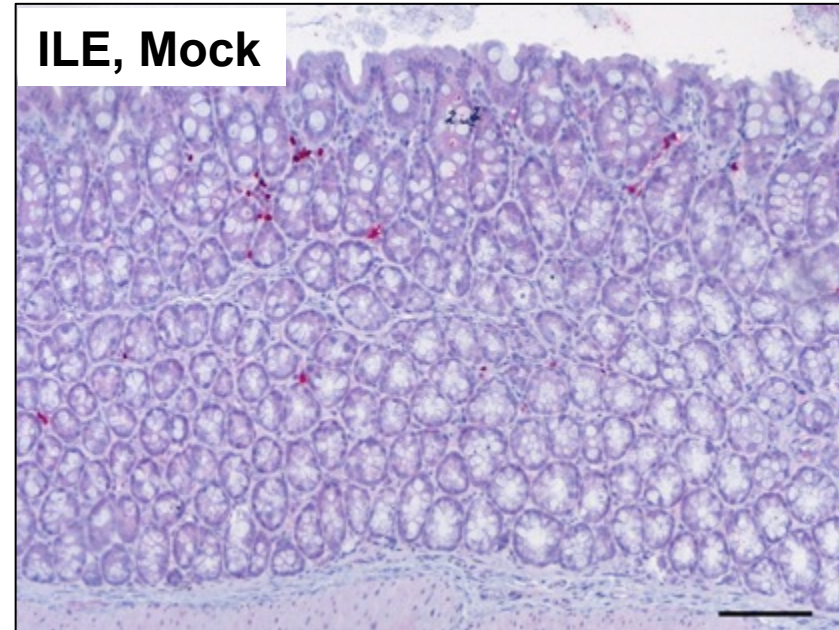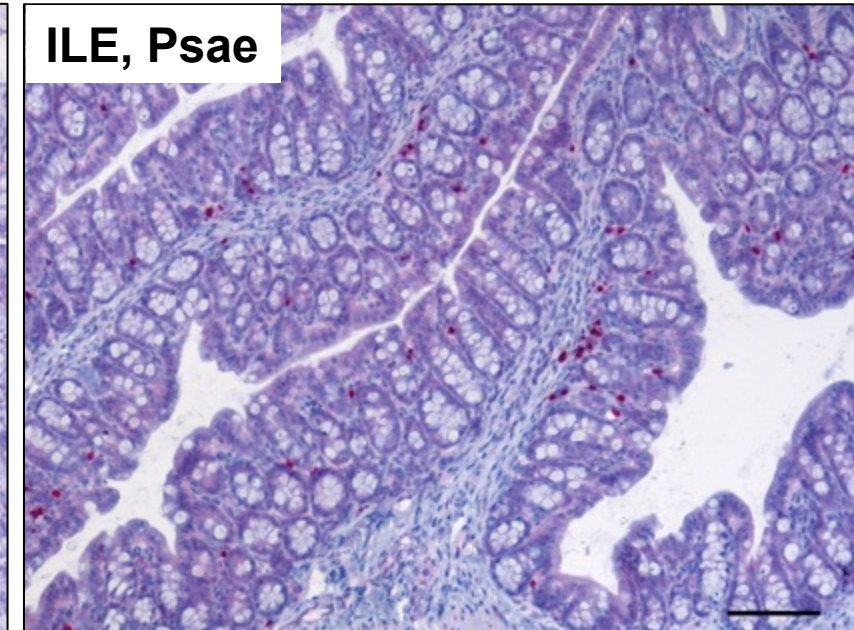

Supplement: Image_3.pdf [file Image_3.pdf]
