# Supplementary material for: Multidrug-Resistant Pseudomonas aeruginosa Accelerate Intestinal, Extra-Intestinal, and Systemic Inflammatory Responses in Human Microbiota-Associated Mice With Subacute Ileitis
Source: PubMed Central journal article supplement (PMC6361842; doi:10.3389/fimmu.2019.00049), 2019-01-29

**A**

# Apoptotic Cells (Casp3+) - LIVER

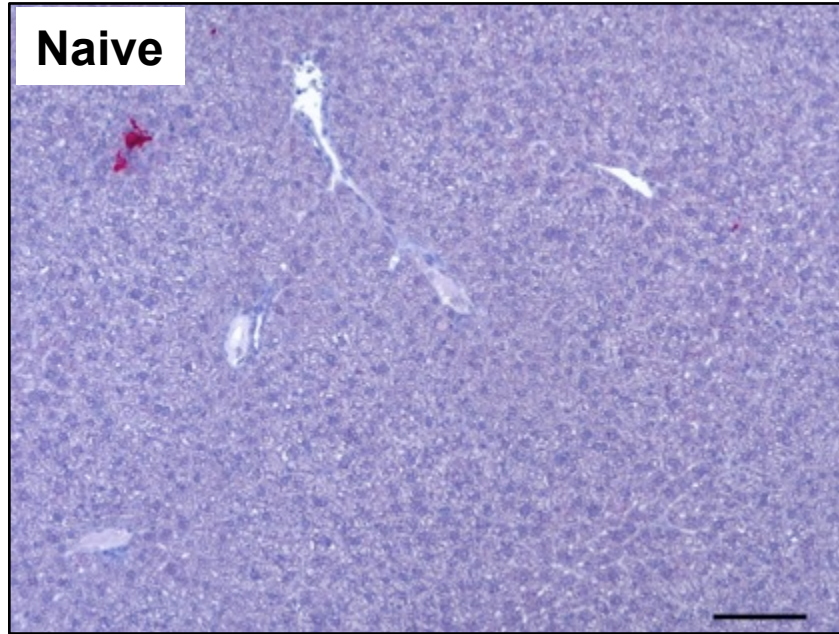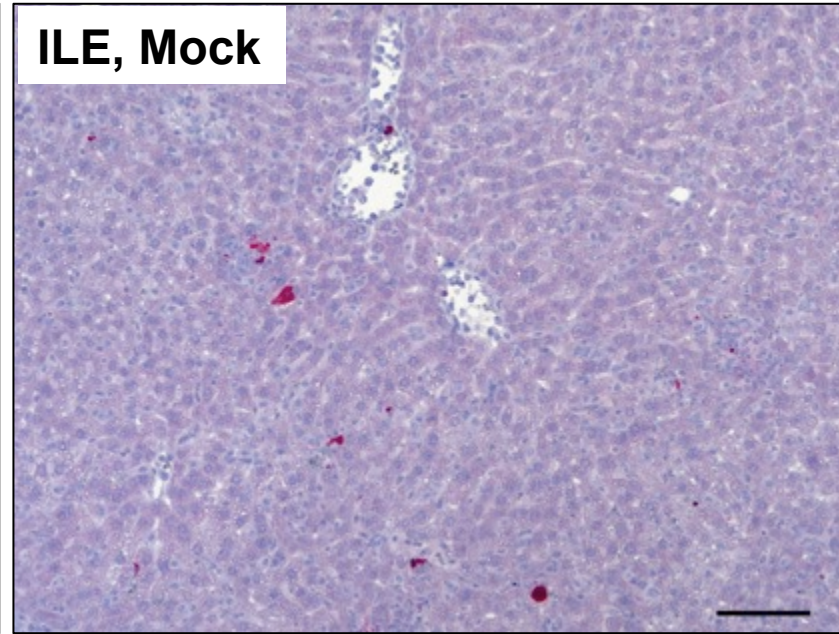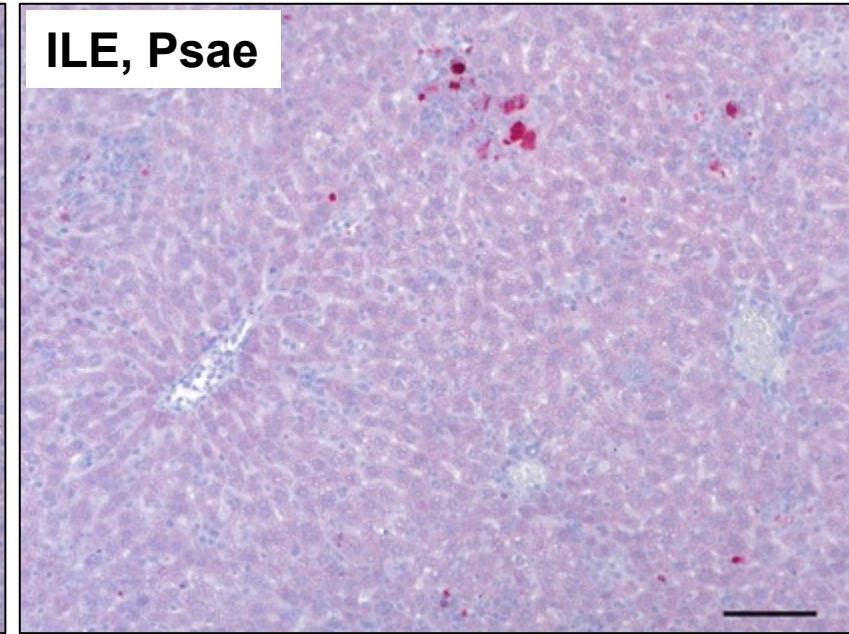

**B**

# T Lymphocytes (CD3+) - LIVER

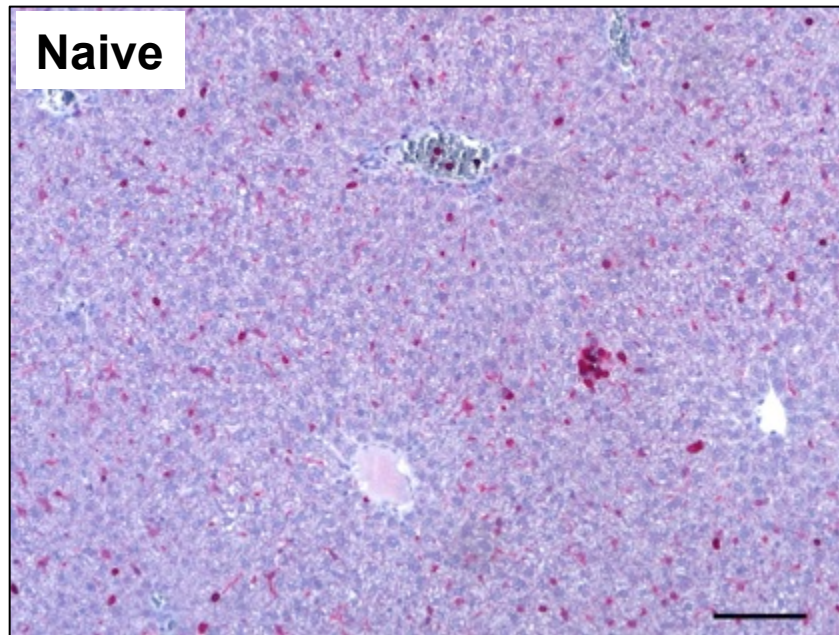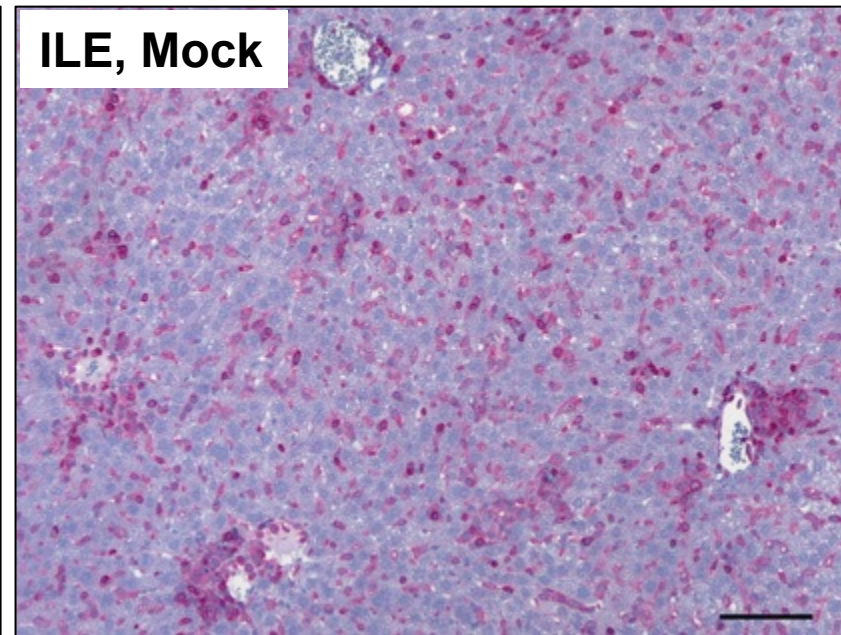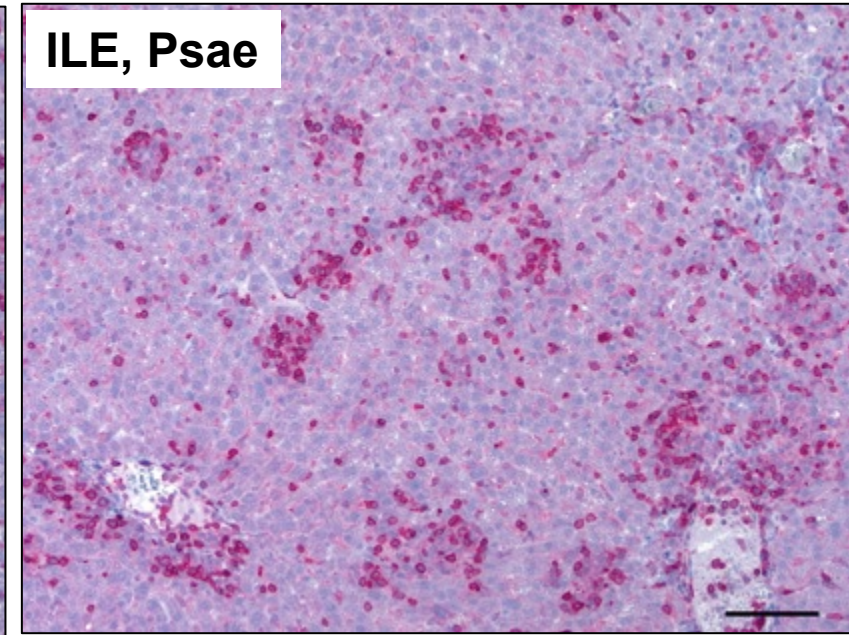

**C**

# Regulatory T Cells (Treg; FOXP3+) - LIVER

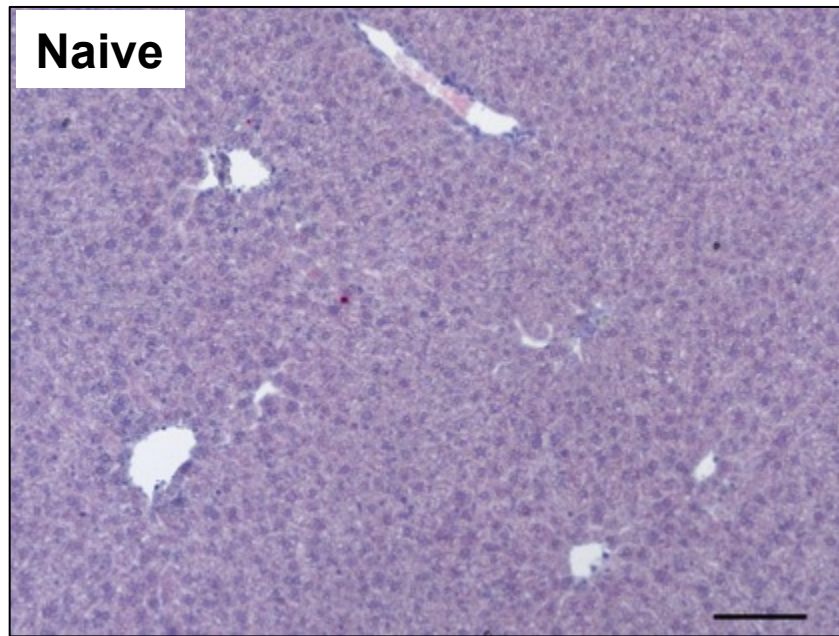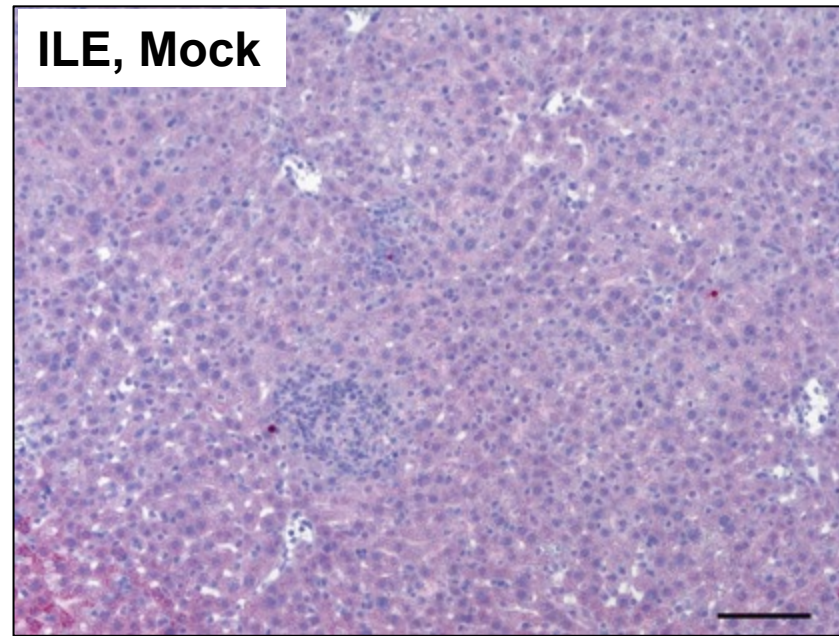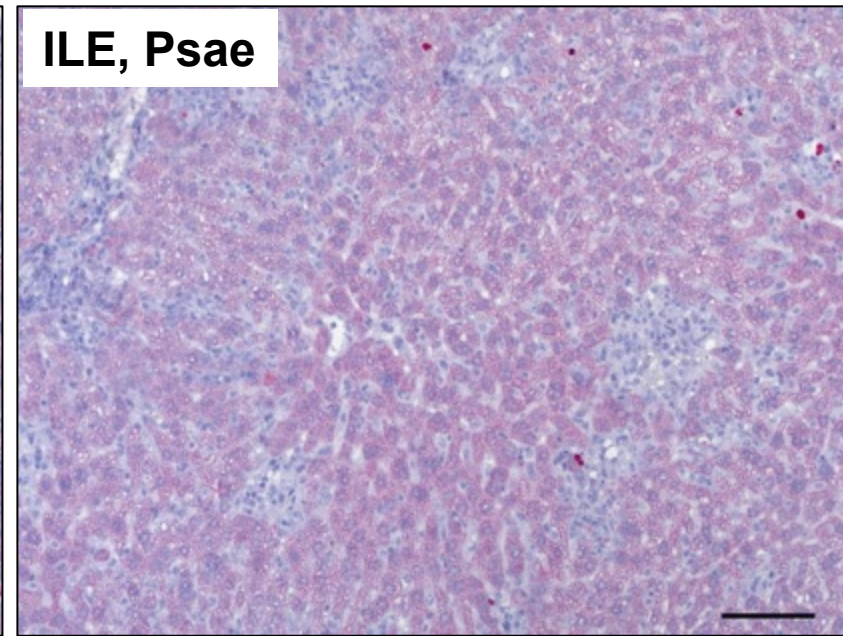

**D**

# Apoptotic Cells (Casp3+) - KIDNEY

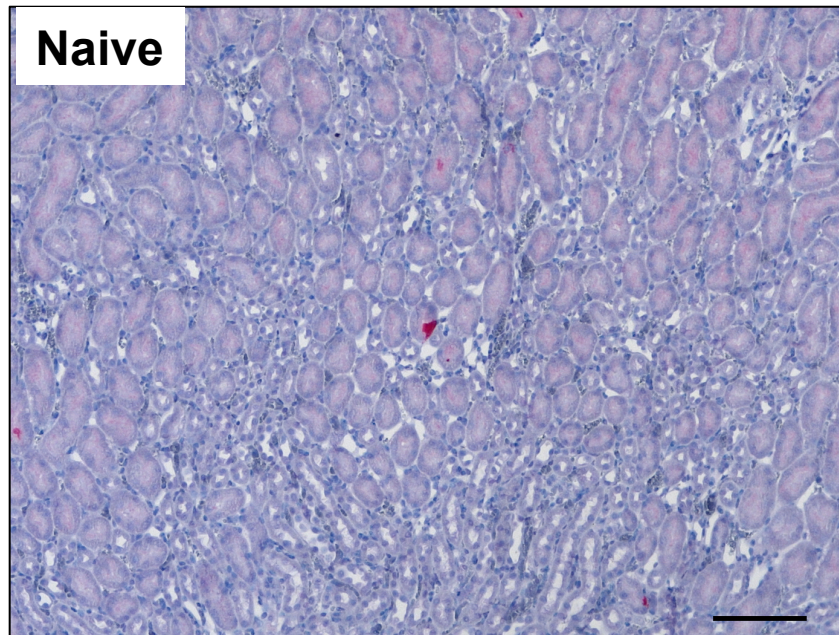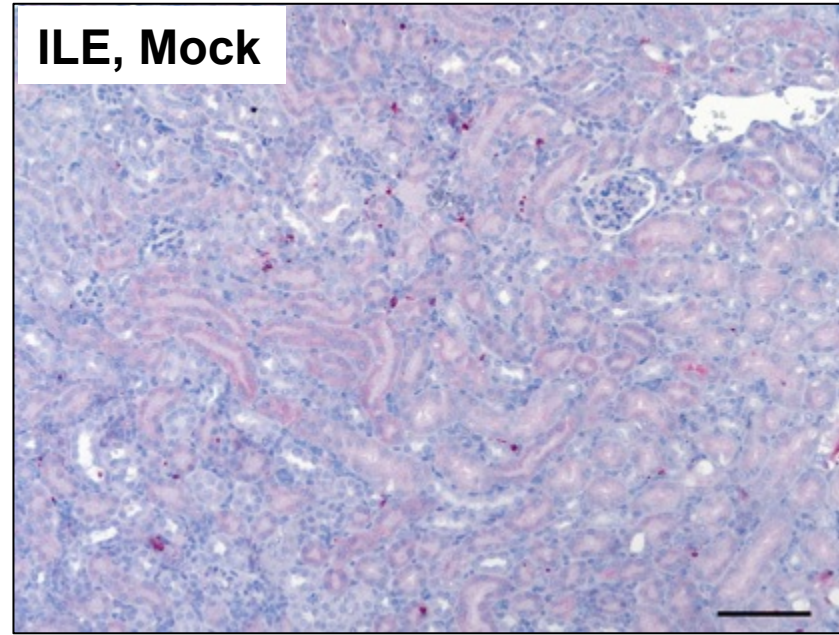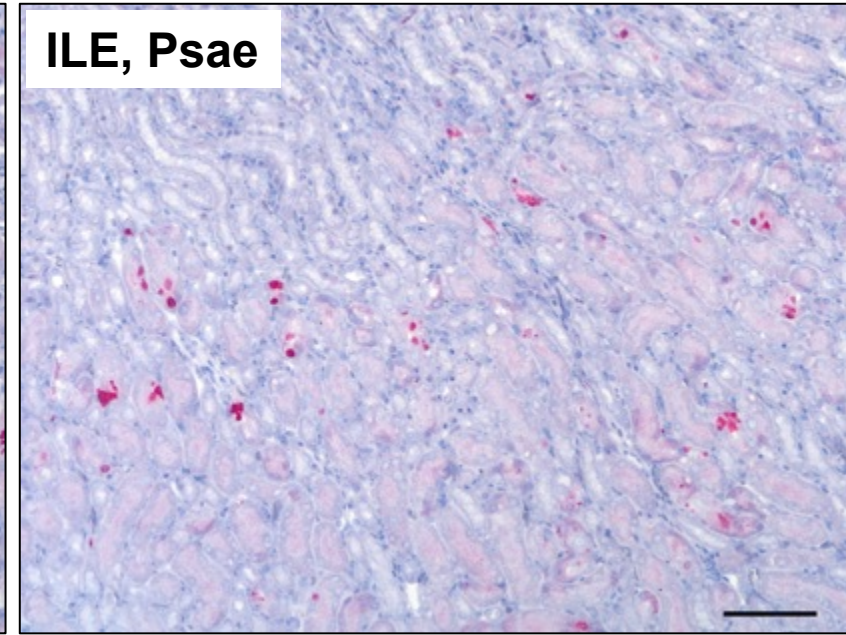

**E**

# T Lymphocytes (CD3+) - KIDNEY

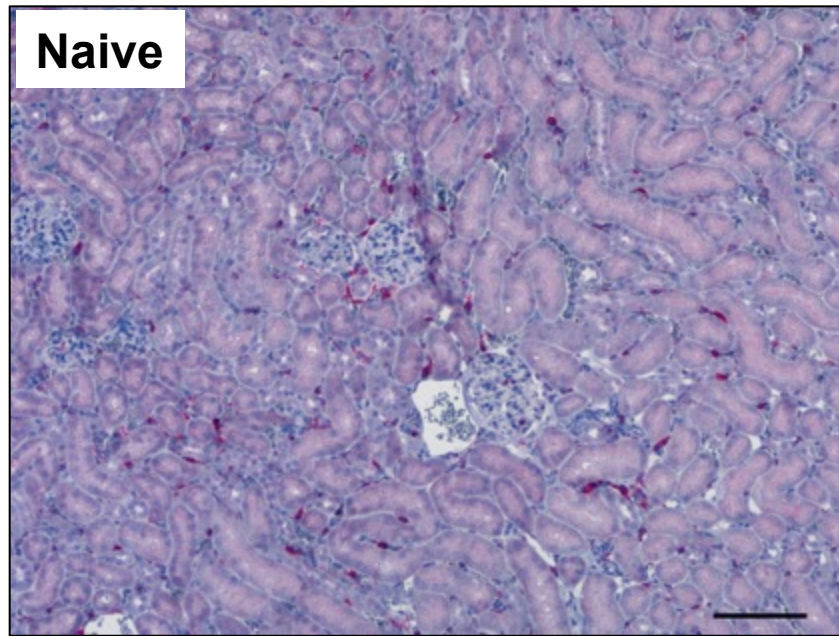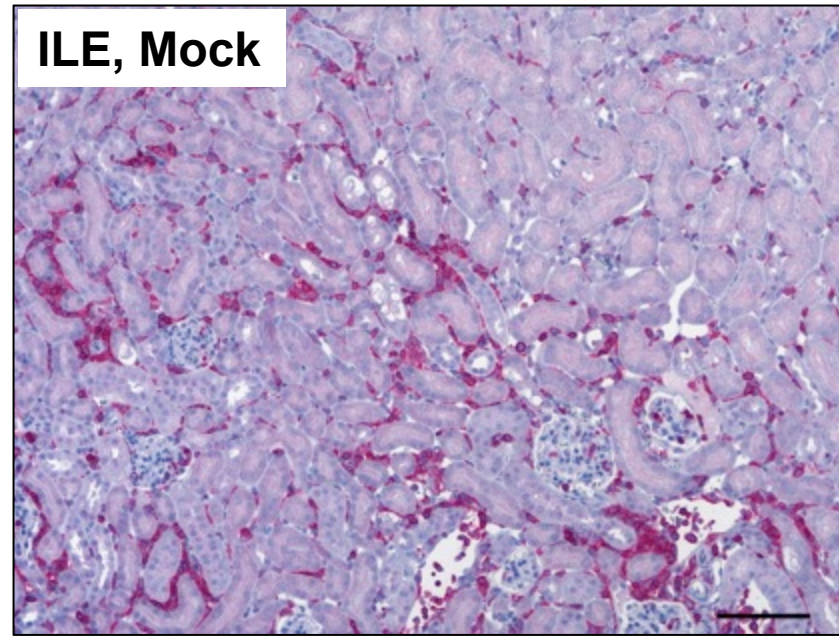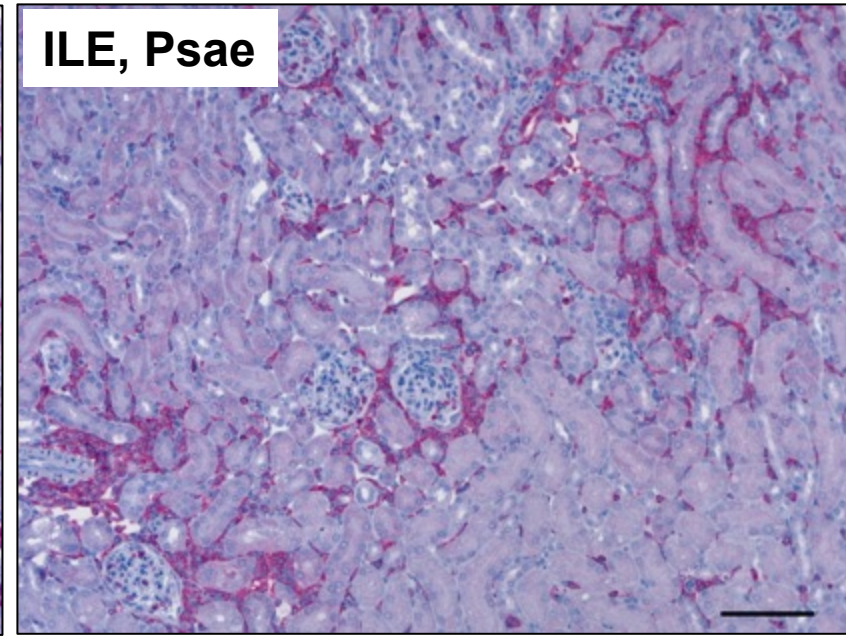

**F**

# Regulatory T Cells (Treg; FOXP3+) - KIDNEY

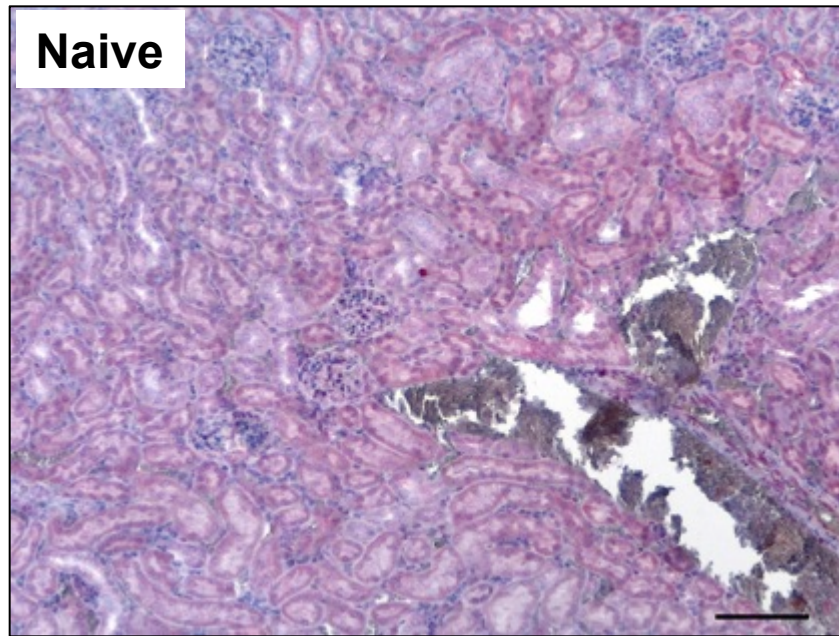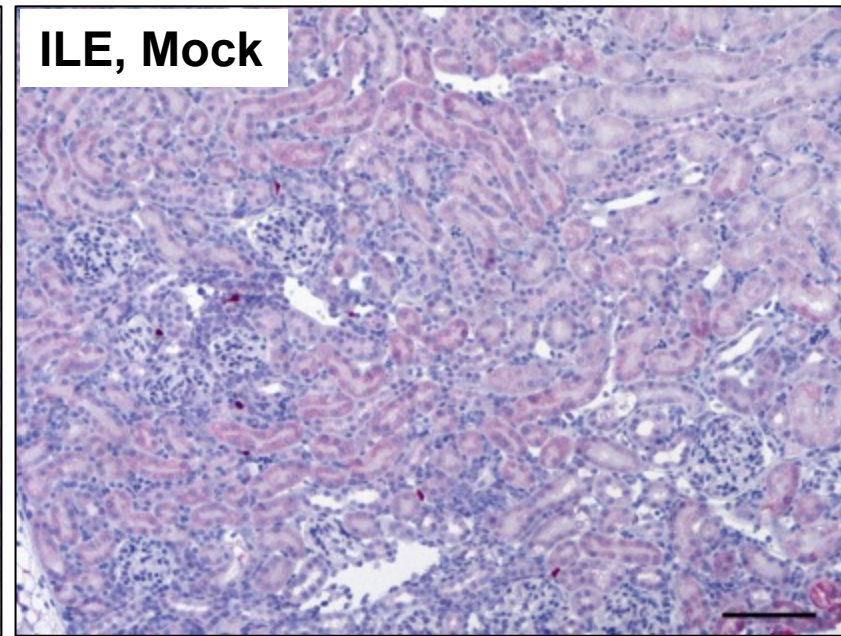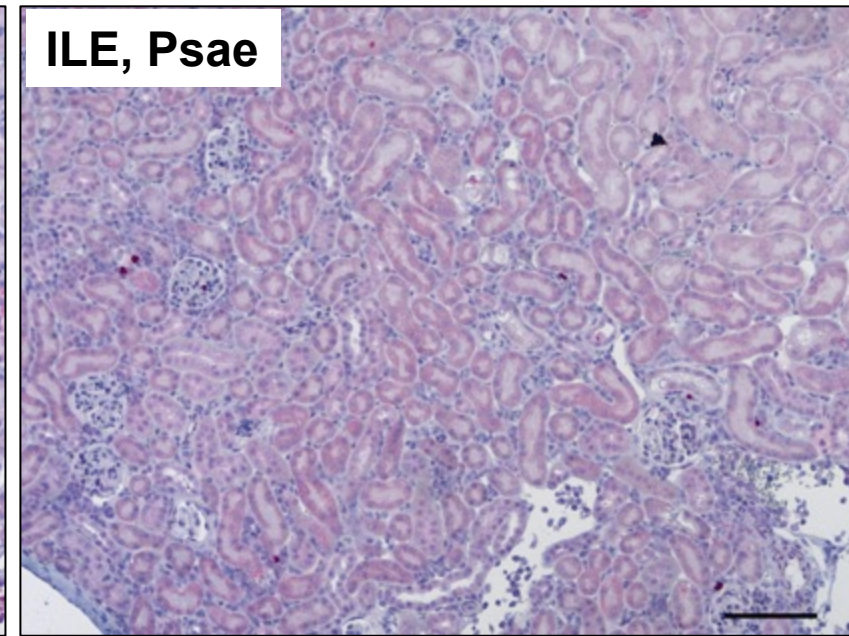

# Apoptotic Cells (Casp3+) - LUNG

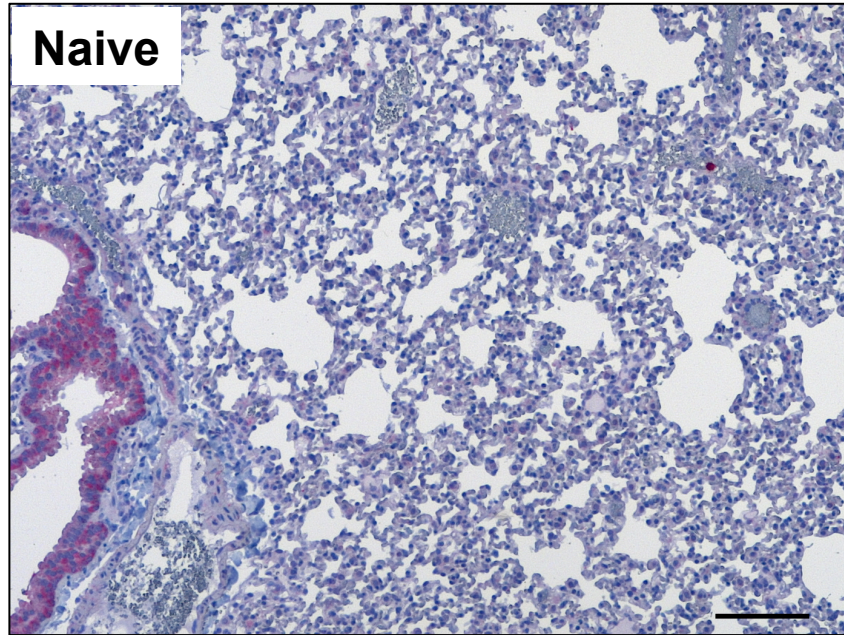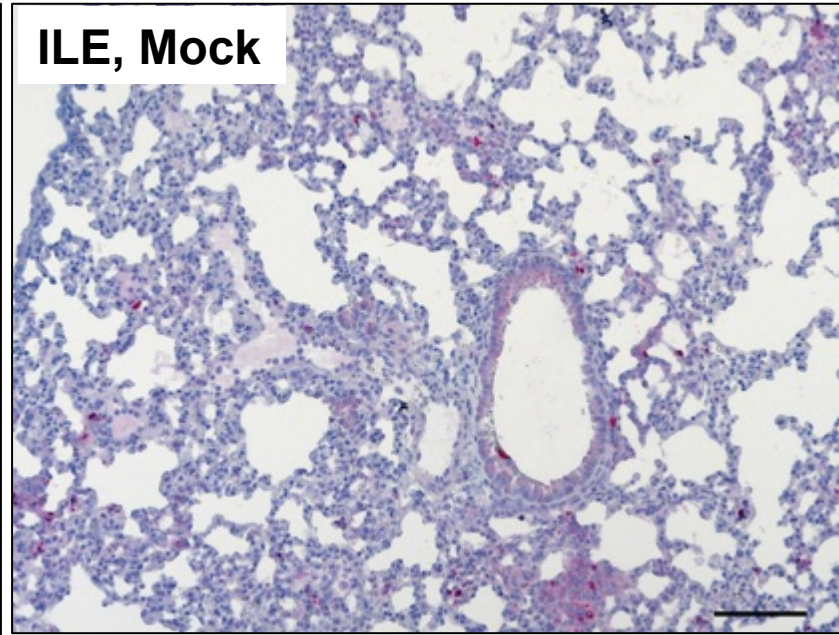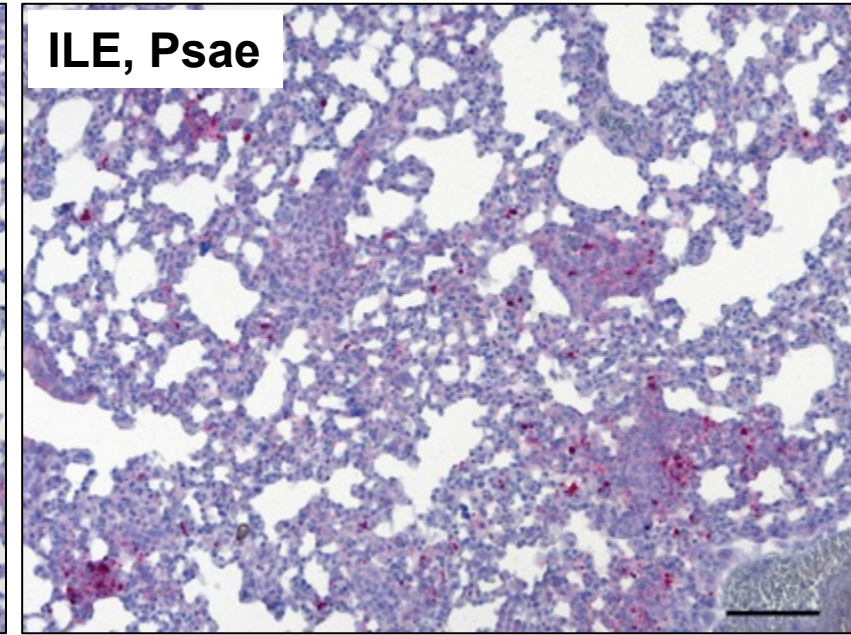

# T Lymphocytes (CD3+) - LUNG

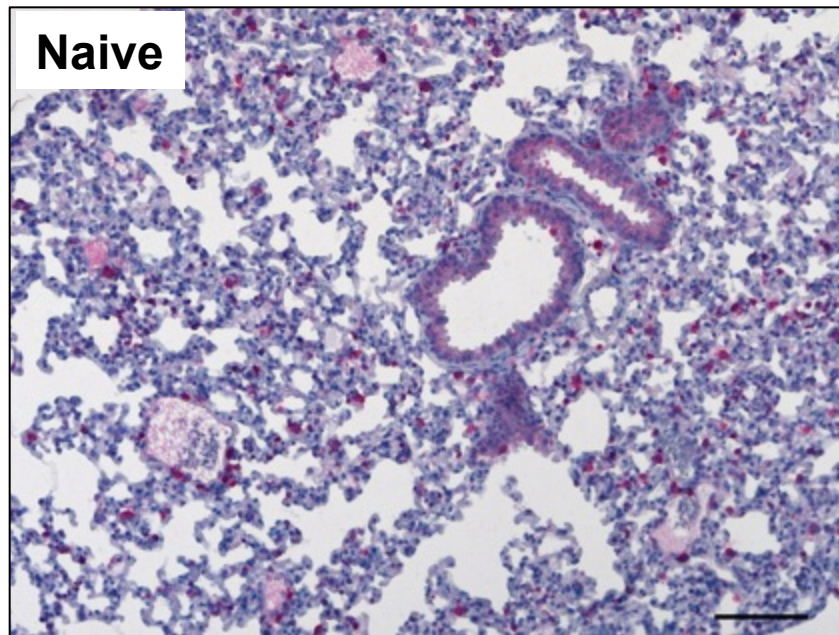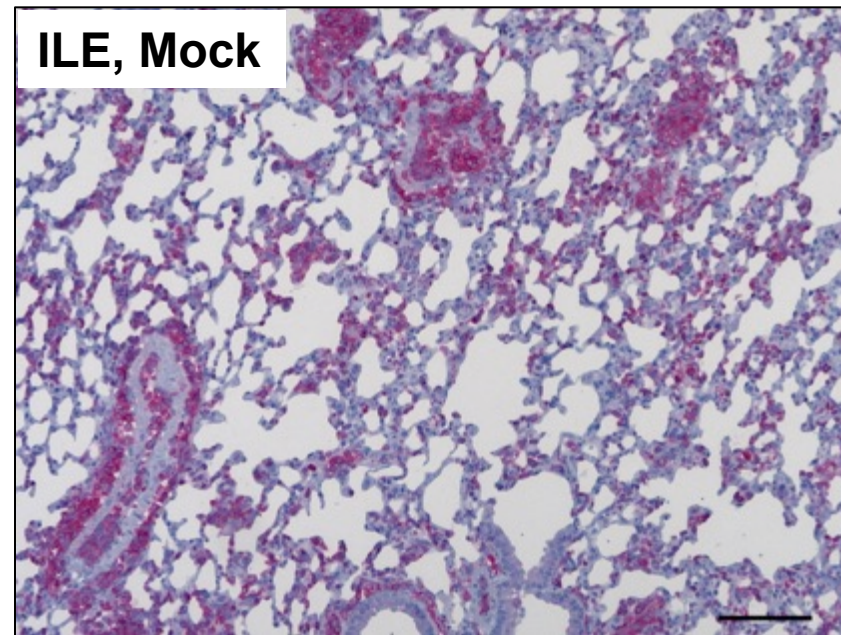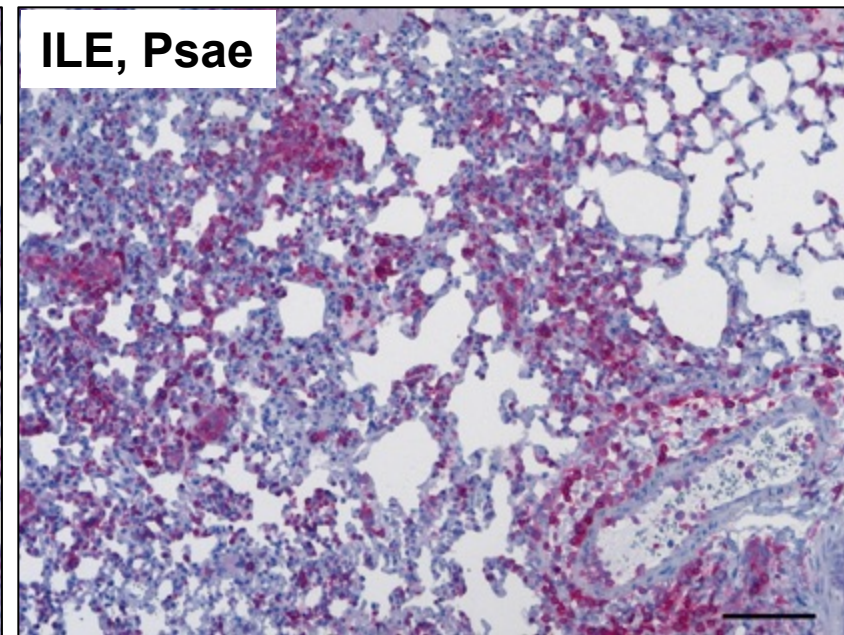



# Regulatory T Cells (Treg; FOXP3+) - LUNG

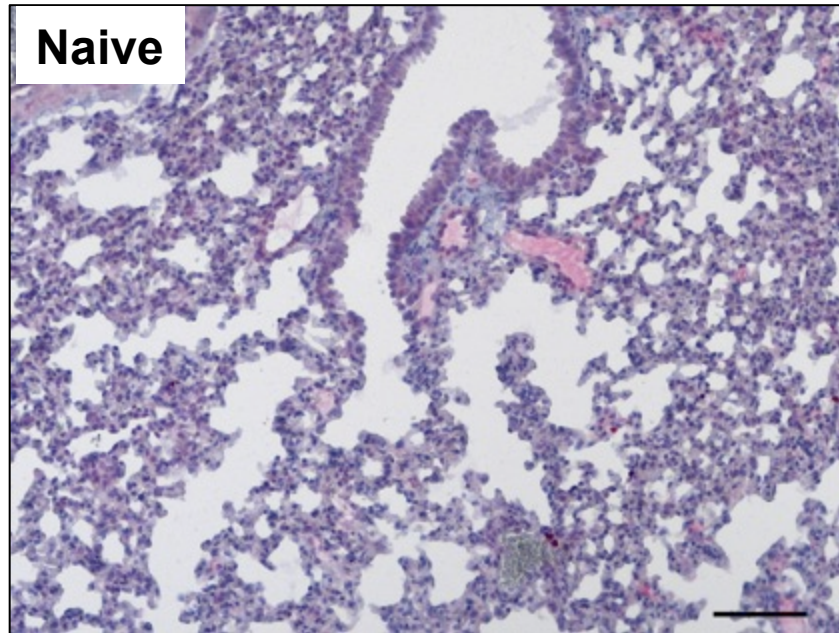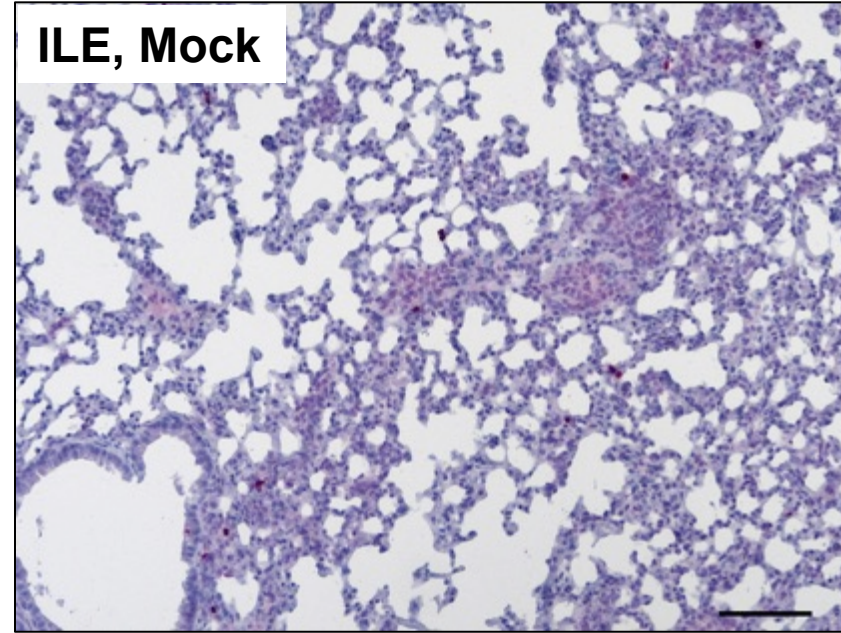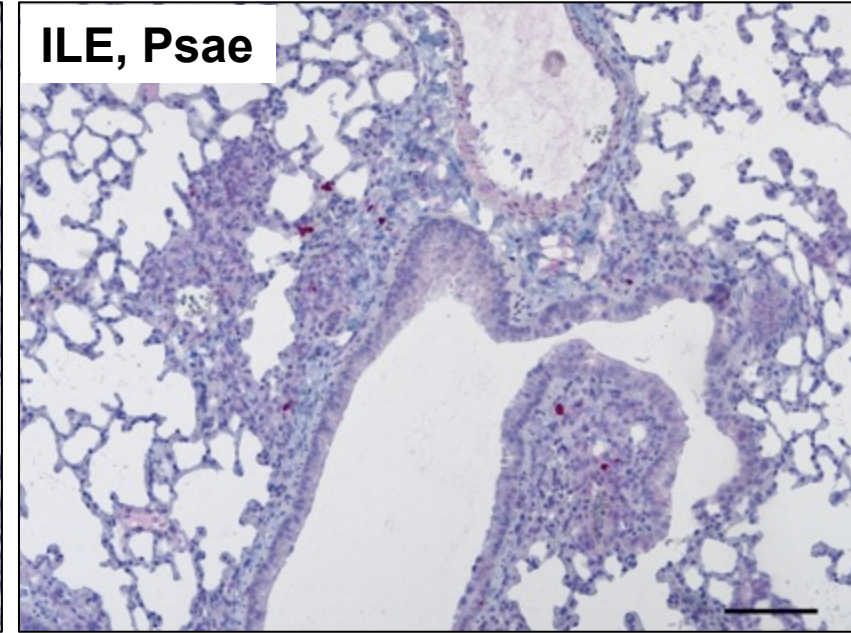

# Apoptotic Cells (Casp3+) - HEART

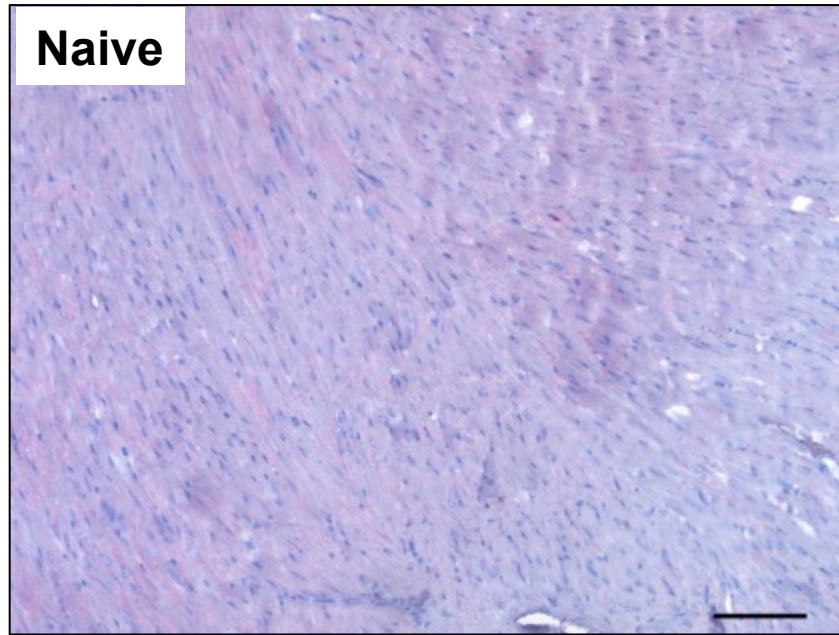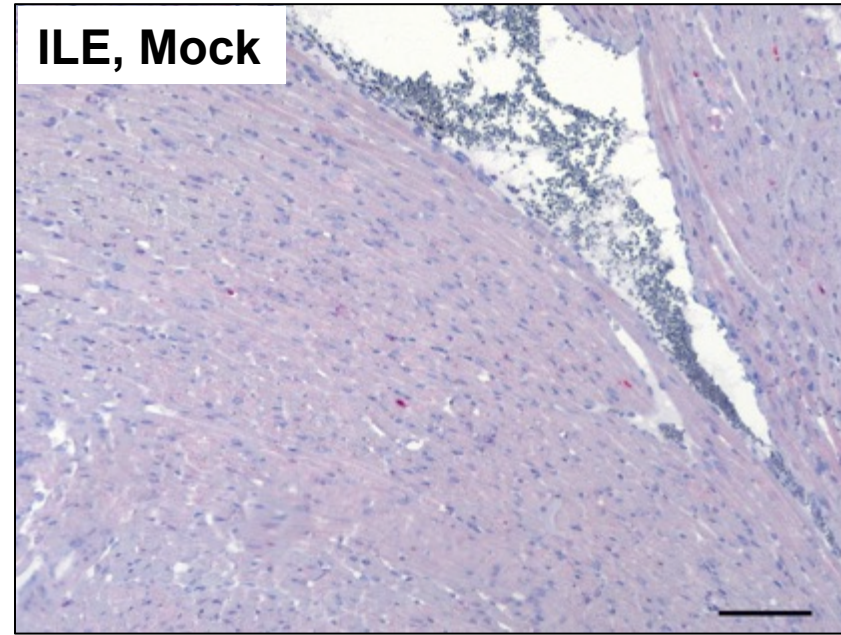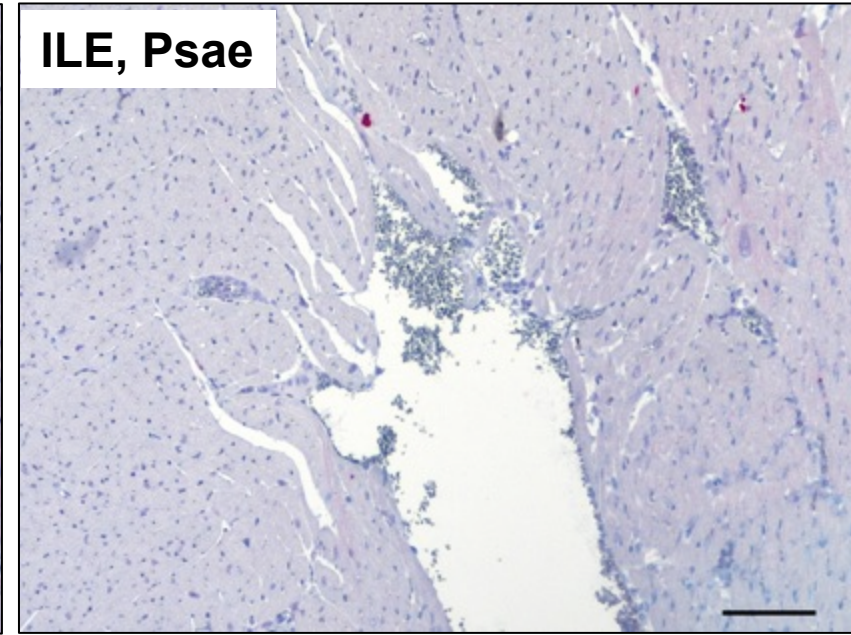

# T Lymphocytes (CD3+) - HEART

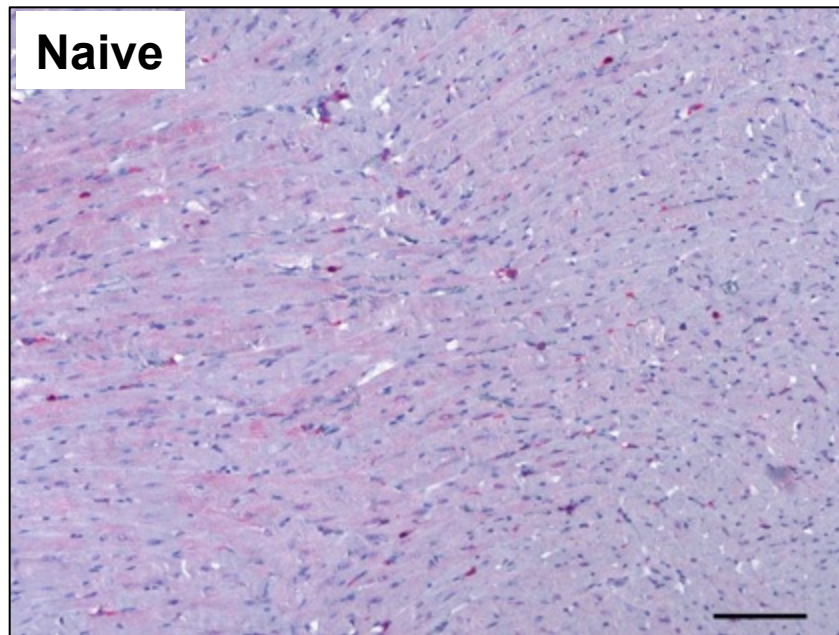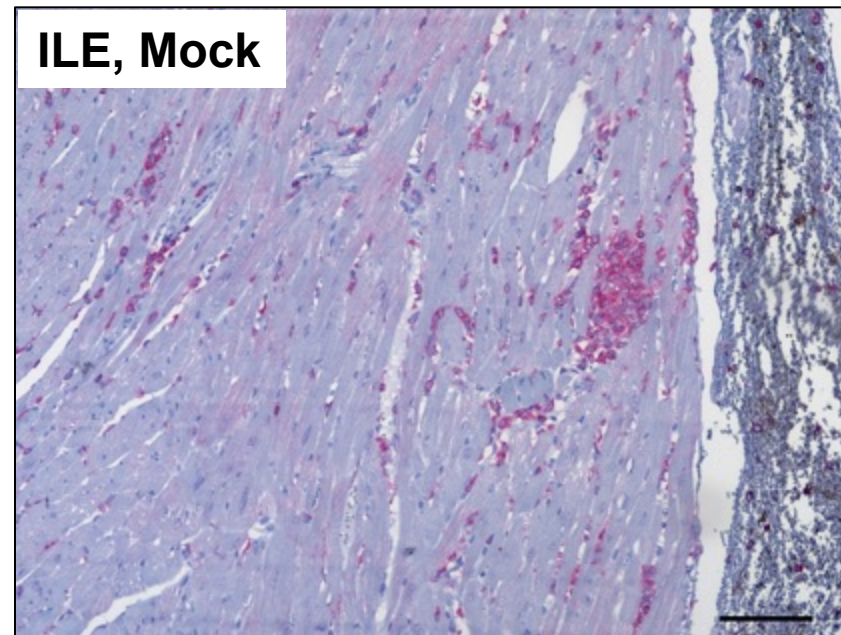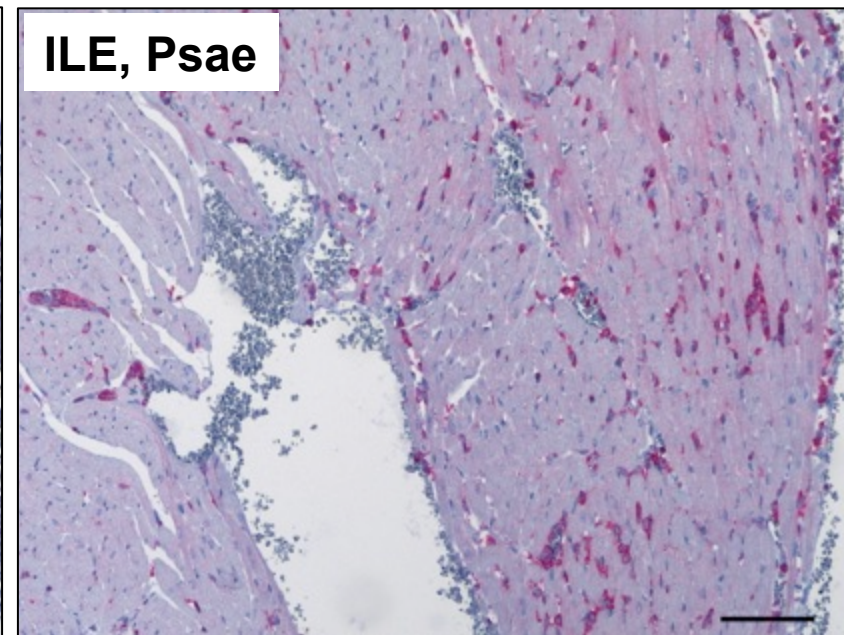

# Regulatory T Cells (Treg; FOXP3+) - HEART

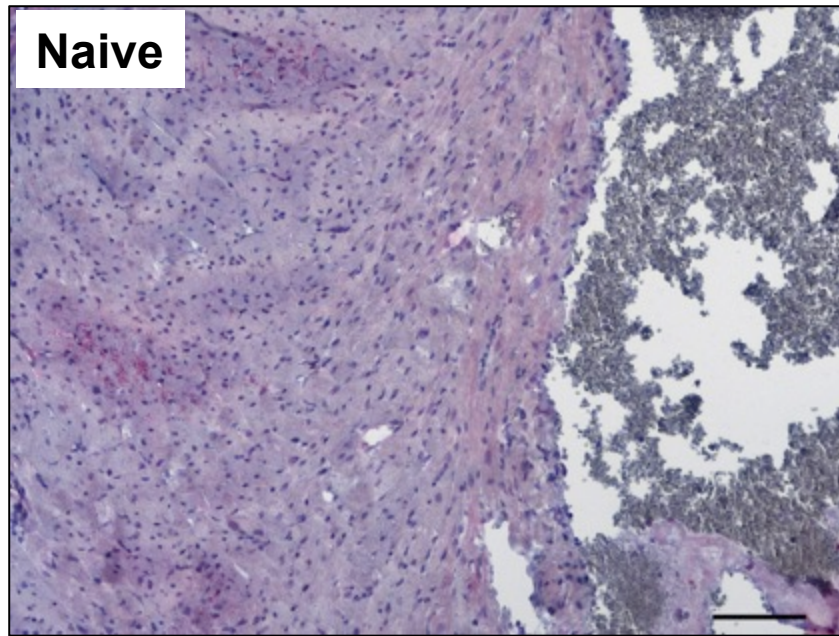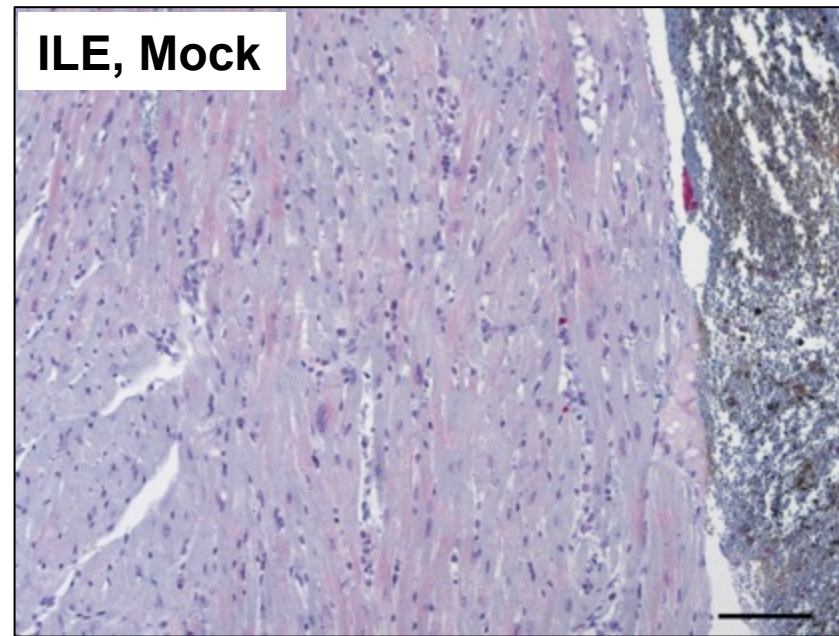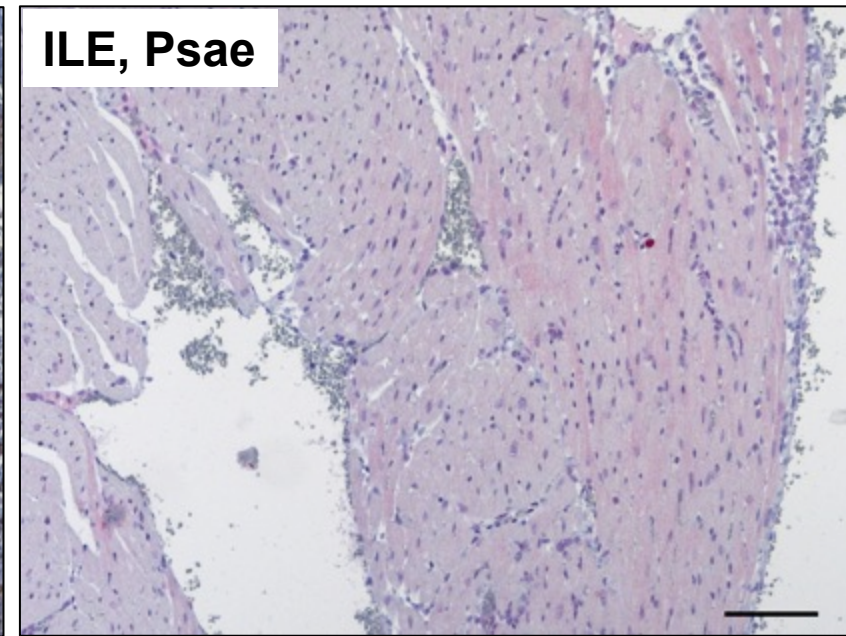

Supplement: Image_5.pdf [file Image_5.pdf]
