# Supplementary material for: Multidrug-Resistant Pseudomonas aeruginosa Accelerate Intestinal, Extra-Intestinal, and Systemic Inflammatory Responses in Human Microbiota-Associated Mice With Subacute Ileitis
Source: PubMed Central journal article supplement (PMC6361842; doi:10.3389/fimmu.2019.00049), 2019-01-29

# Experimental Setup

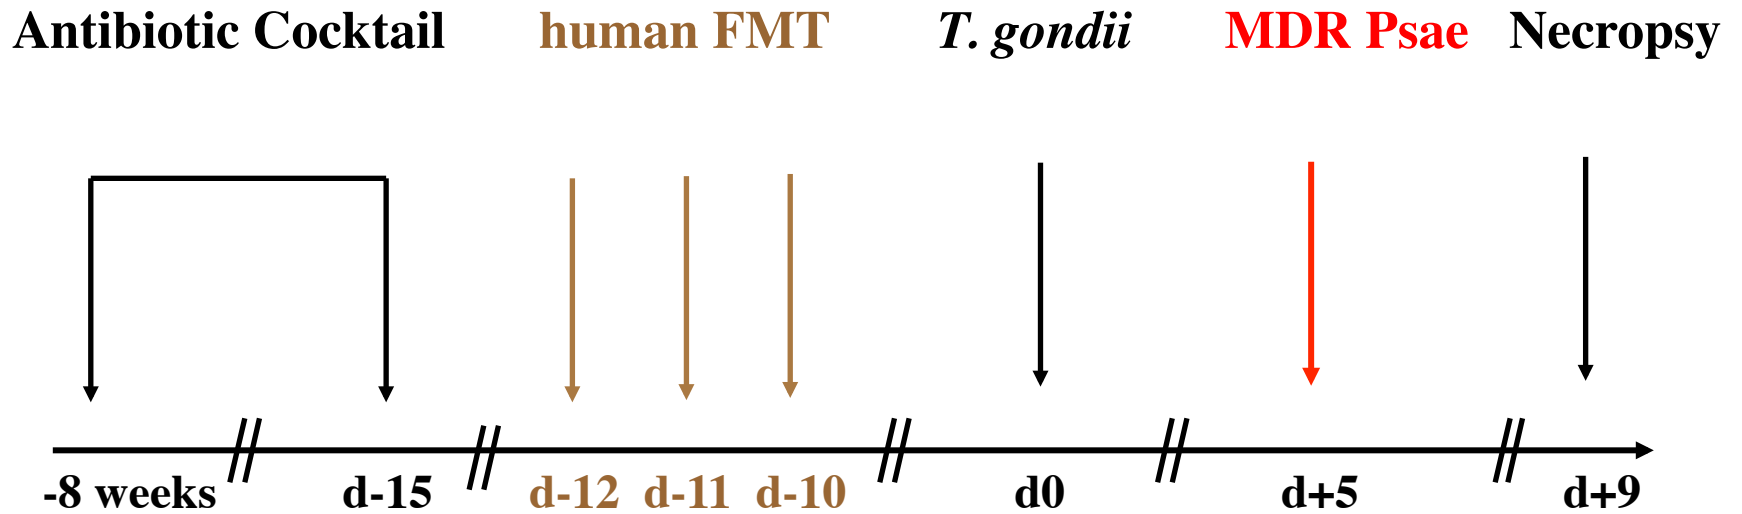

Supplement: Image_1.pdf [file Image_1.pdf]
